# Supplementary material for: Graphene: Hexagonal Boron Nitride Composite Films with Low-Resistance for Flexible Electronics
Source: Nanomaterials (Basel). 2022 May 17;12(10):1703. doi: 10.3390/nano12101703 (PMC9147634; doi:10.3390/nano12101703)
Supplement: Supplementary file 1 [file nanomaterials-12-01703-s001.zip]

Archive with 4 entries (4 files):
- Graphene+h-BN.mp4
- Graphene.mp4
- h-BN.mp4
- nanomaterials-1651444-supplementary.pdf
